# Supplementary material for: A facile and efficient preparation of anatase titania nanoparticles in micelle nanoreactors: morphology, structure, and their high photocatalytic activity under UV light illumination
Source: Royal Society of Chemistry journal article supplement (doi:10.1039/c4ra10018b), 2014-01-01
Supplement: c4ra10018b1.pdf [file c4ra10018b1.pdf]

## Supporting Information

# A facile and efficient preparation of anatase titania nanoparticles in micelle nanoreactors: Morphology, structure, and their high photocatalytic activity under UV light illumination

Reza Abazari <sup>a</sup>, Ali Reza Mahjoub <sup>a,\*</sup> and Soheila Sanati <sup>b</sup>

<sup>a</sup> *Department of Chemistry, Tarbiat Modares University, P.O. Box 14115-175, Tehran, Iran*

<sup>b</sup> *Department of Chemistry, Faculty of Basic Sciences, Azarbaijan Shahid Madani University, Tabriz, Iran*

### E-mail address:

**Corresponding author:** [mahjouba@modares.ac.ir](mailto:mahjouba@modares.ac.ir) (A. R. Mahjoub)

**First author:** [r.abazari@sina.kntu.ac.ir](mailto:r.abazari@sina.kntu.ac.ir) (R. Abazari)

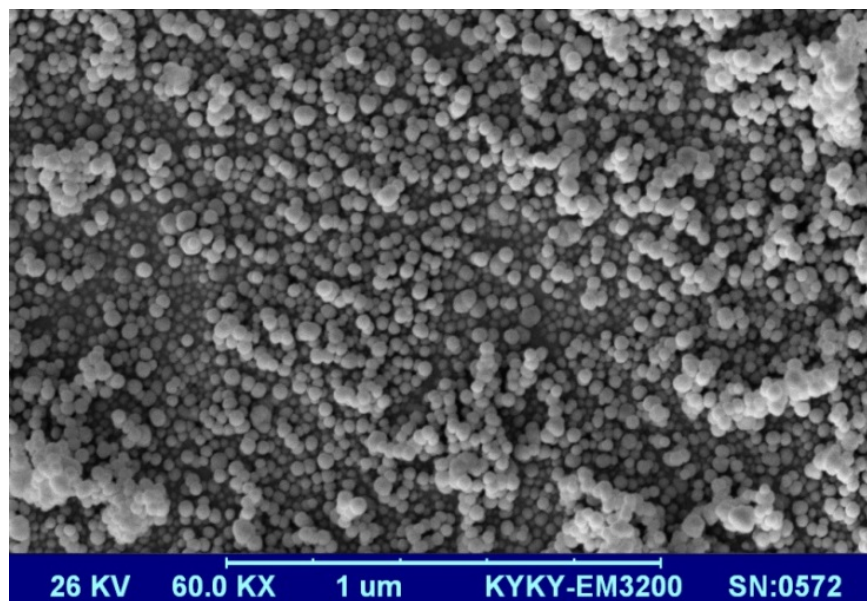

**Figure S1.** SEM image of spherical TiO<sub>2</sub> nanoparticles synthesized in micelle system.

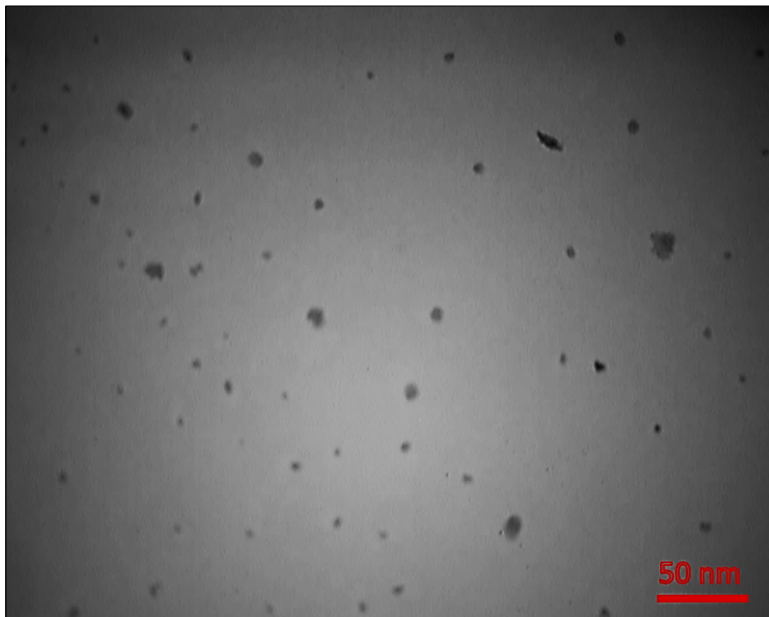

**Figure S2.** TEM image of titania nanoparticles formed in micelle nanoreactors, scale bar 50 nm.

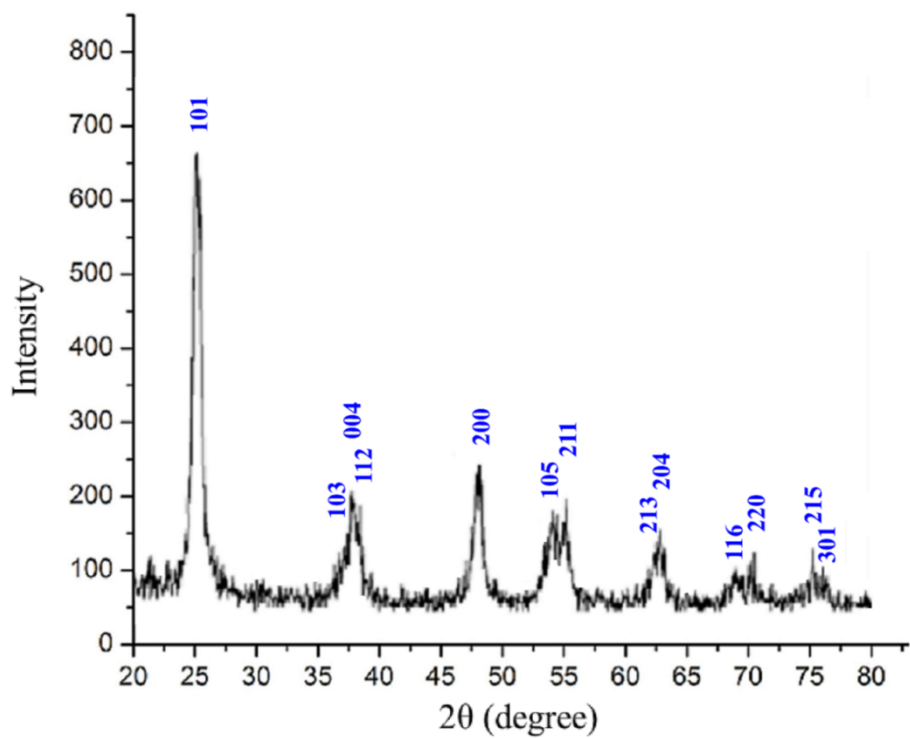

**Figure S3.** X-ray diffraction (XRD) spectrum of anatase titania nanoparticles calcined at 500 °C for 4 h in air.

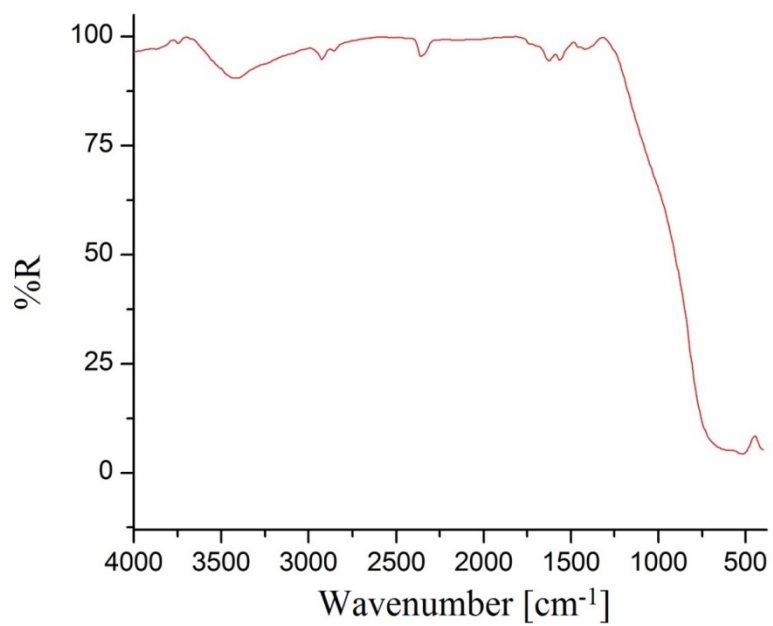

**Figure S4.** FT-IR spectra of the titania nanoparticles formed in water/CTAB/1-Hexanol/isooctane micelle nanoreactors.

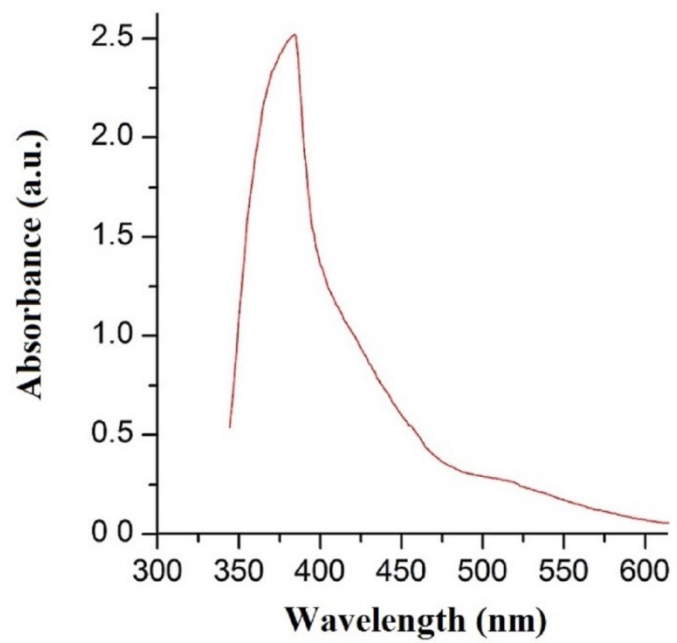

**Figure S5.** UV–Vis spectra of the titania nanoparticles produced in micelle nanoreactors.

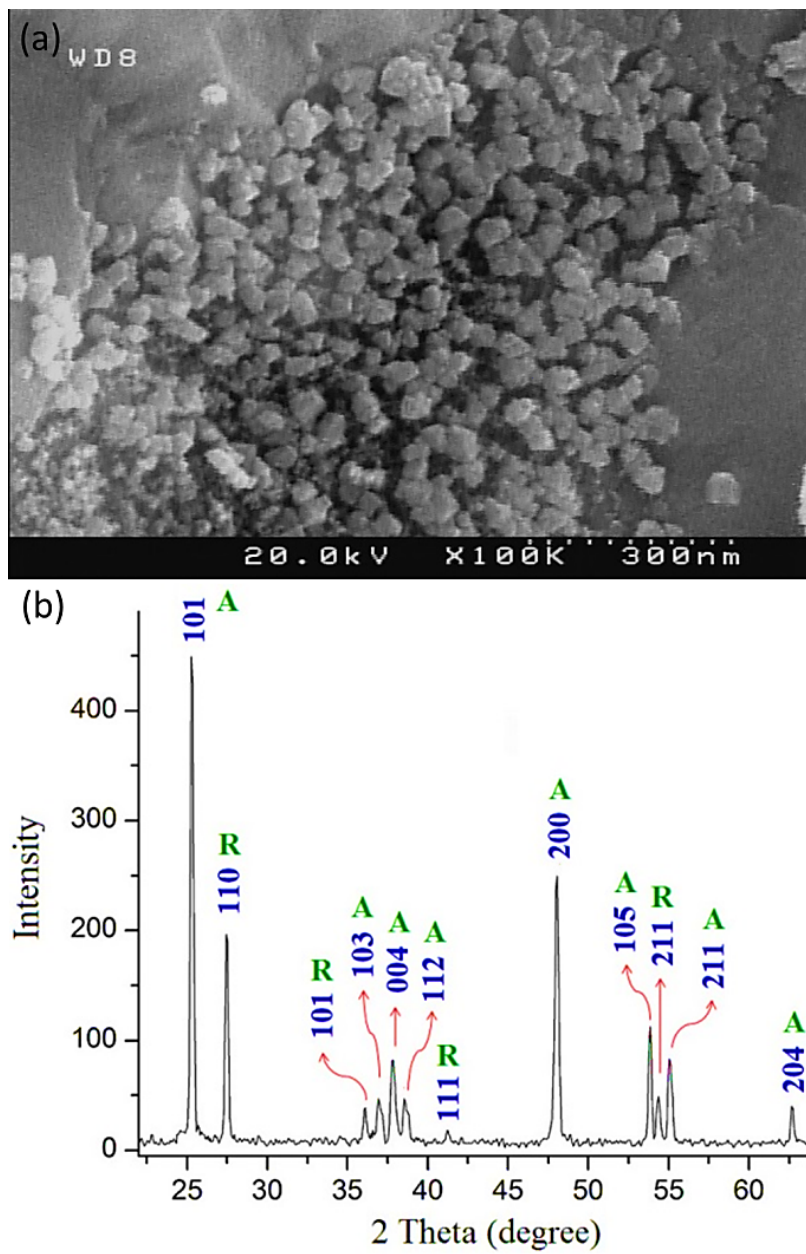

**Figure S6.** SEM image (a) and X-ray diffraction pattern (b) of the commercial P25 TiO<sub>2</sub> particles.

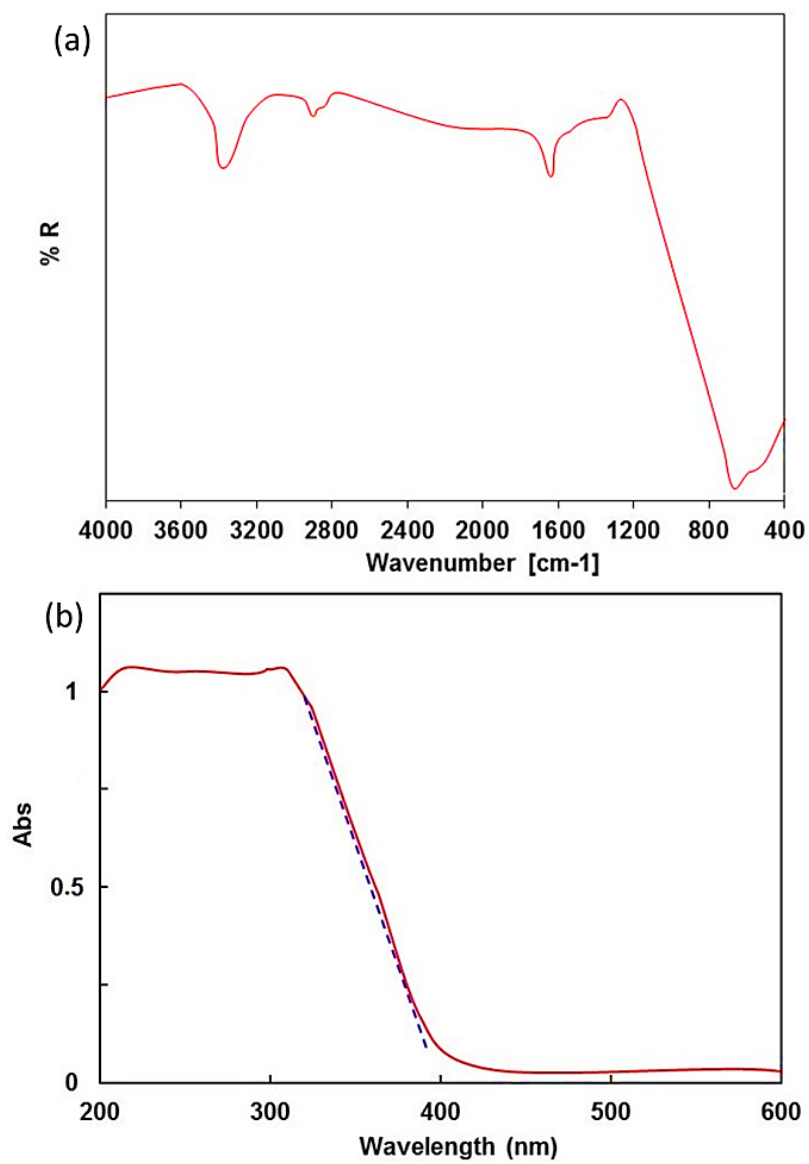

**Figure S7.** FT-IR spectra (a) and UV-Vis absorbance spectra (b) of the commercial P25 TiO<sub>2</sub> particles.



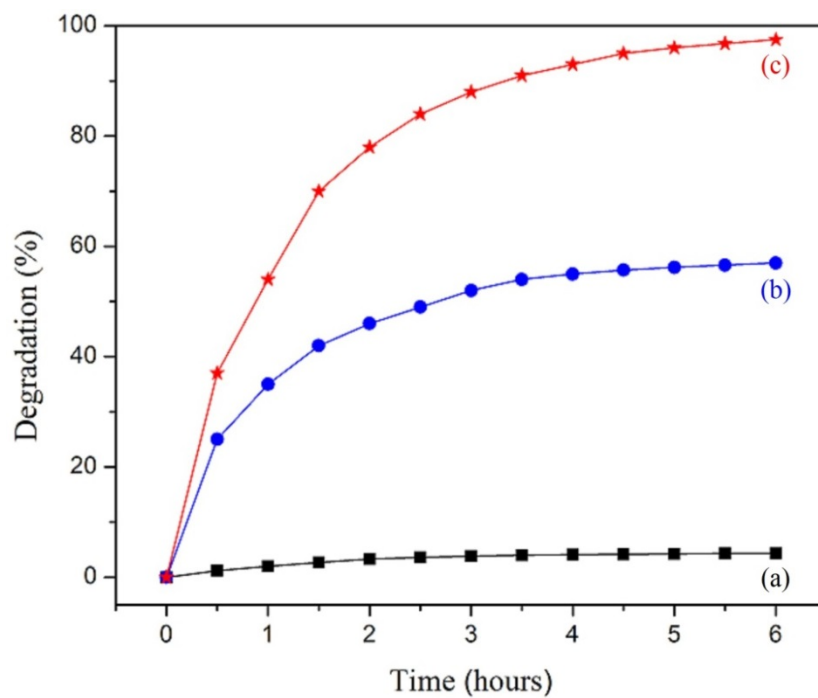

**Figure S8.** Photocatalytic efficiency of the MB dye degradation percentage curves under ultraviolet light irradiation: (a) without photocatalyst; (b) commercial P-25 TiO<sub>2</sub> powder; and (c) titania nanoparticles.

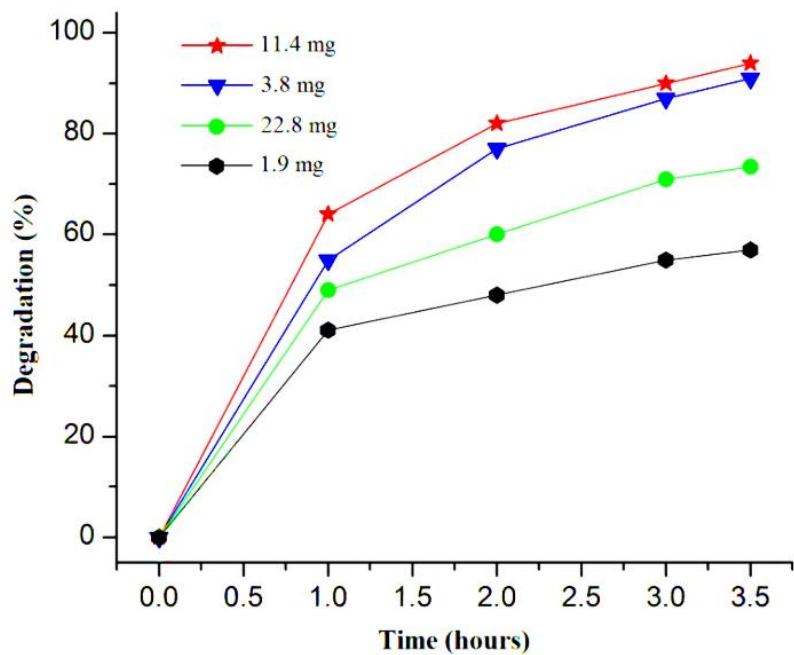

**Figure S9.** Effects of amount of the TiO<sub>2</sub> nanoparticles in the MB dye photocatalytic degradation.

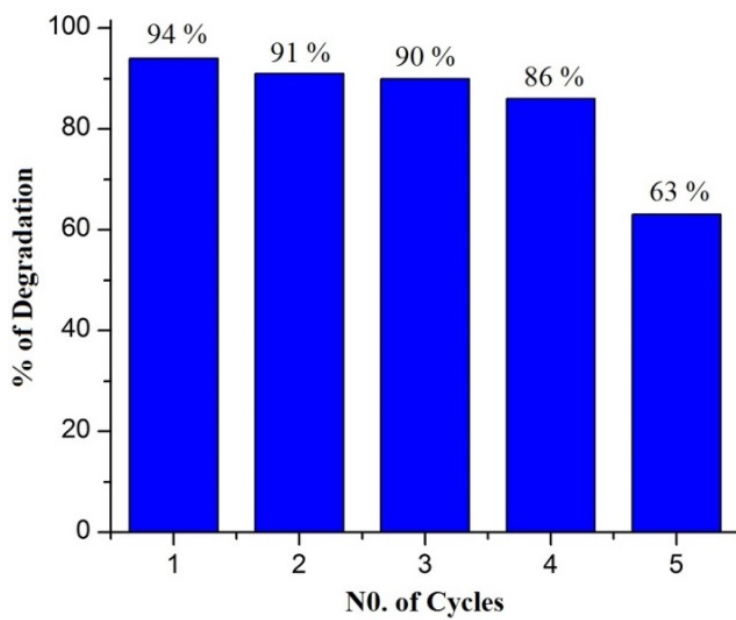

**Figure S10.** Recycle and reuse of TiO<sub>2</sub> nanoparticles for MB dye photocatalytic degradation.
